# Supplementary material for: Predicting absorption of compounds from an in vivo liver surface based on molecular weight or in vitro release using a dialysis membrane in combination with lipophilicity
Source: Royal Society of Chemistry journal article supplement (doi:10.1039/d5pm00054h), 2025-01-01
Supplement: d5pm00054h1.pdf [file d5pm00054h1.pdf]

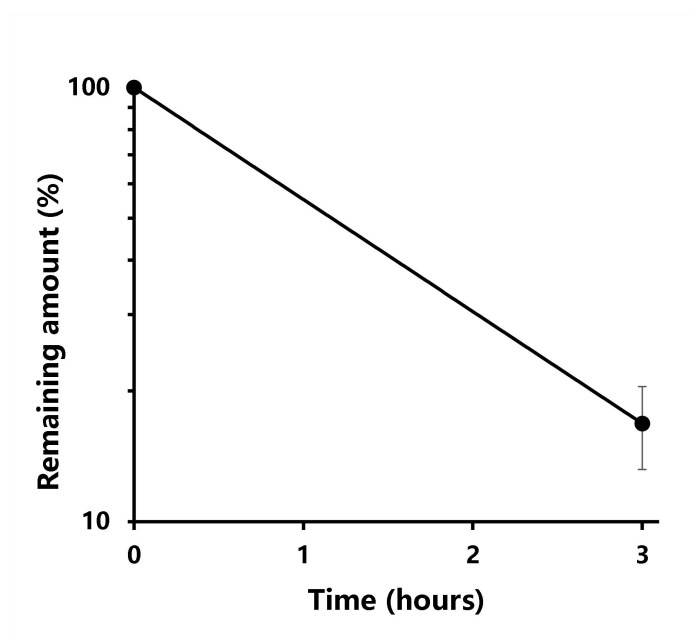

**Supplementary Fig 1.** Semi-log plot of remaining amount of DOX in diffusion cell after application to rat liver surface.
